# Supplementary material for: Transcriptomic signature can distinguish chronic neutrophilic leukemia from ambiguous neutrophilic leukemias
Source: Front Genet. 2025 Apr 4;16:1556519. doi: 10.3389/fgene.2025.1556519 (PMC12006112; doi:10.3389/fgene.2025.1556519)
Supplement: Supplementary file 12 [file DataSheet1.xlsx]

## Sheet: Sheet1
Brown module
ABCC2
FSTL4
YIPF1
MEF2A
FCGR2B
IL4R
MKNK1
RNF13
SNAP23
SH3GLB1
MARCHF2
PACSIN2
THOC5
ZMAT5
GMPR2
GMPR2
DHRS12
USB1
AP3B2
CPEB3
GALK1
KLHL2
LPCAT3
MAK
GABRR2
VNN2
TFEB
TMCO6
CR2
DDX59
RNF146
CPNE5
RTN2
SIRPD
ADGRE2
POR
ALDH1A2
SIGLEC9
TBC1D14
NUMB
TMEM165
NPL
KIAA0319
CASP5
ETFBKMT
MCTP2
IFNAR1
SIGLEC10
FCGR2A
C1orf56
HORMAD1
CREB5
SLC12A9
GCNA
SCN2B
FCGR1A
IPMK
AMN1
LY96
VPS8
ST3GAL2
PIP
ALPL
FCRLB
DISC1
CAPN13
INHBB
TGFA
AIM2
RBM47
HPGD
NOXRED1
DHRS13
NSG2
TSEN34
TSEN34
TSEN34
TSEN34
TSEN34
TSEN34
TSEN34
TSEN34
TSEN34
TSEN34
CANT1
NHLH1
HSPA6
STAT5B
TLR10
TLR1
TLR6
TMEM167A
NLRP6
CREG2
LPCAT4
SLCO3A1
THAP5
NSUN7
CSNK1A1L
LINC02363
WDFY3-AS2
ST20
SLC8A1
GBP6
ZNF438
KCNH7
IFITM2
KIAA0825
TLR5
TPK1
TECPR2
IRAK4
FCGR1B
CACNA1E
GK
R3HDM4
TBKBP1
CR1
PLIN5
BASP1-AS1
LY86-AS1
CKLF
TAS2R40
C3orf86
LOC100505774
NFE4
AOAH-IT1
LOC100289473
LOC100996318
LINC01503
FAM157A
IL10RB
LILRA6
LILRA6
LILRA6
LILRA6
LILRA6
CCDC13
NSMCE1-DT
LOC645513
INSL3
LINC01948
NAIP
NAIP
NAIP
LOC105375903
CKLF-CMTM1
MGAM2
MGAM2
SNAI3-AS1
FCGR1CP
MKNK1-AS1
